1

# 1 **How neural circuits achieve and use stable dynamics**

2 Leo Kozachkov<sup>1,2,3, \*</sup>, Mikael Lundqvist<sup>1,2, \*</sup>, Jean-Jacques Slotine<sup>1,3, ¥</sup> & Earl K. Miller<sup>1,2, ¥</sup>

3 \*co-first authors, ¥ co-senior PIs

4

5 1. The Picower Institute for Learning & Memory, Massachusetts Institute of Technology (MIT), Cambridge, MA 02139,  
6 USA

7 2. Department of Brain & Cognitive Sciences, Massachusetts Institute of Technology (MIT), Cambridge, MA 02139,  
8 USA

9 3. Nonlinear Systems Laboratory, Massachusetts Institute of Technology, Cambridge, Massachusetts 02139, USA.

## 10 **1 Abstract**

11

12 The brain consists of many interconnected networks with time-varying activity. There  
13 are multiple sources of noise and variation yet activity has to eventually converge to a  
14 stable state for its computations to make sense. We approached this from a control-  
15 theory perspective by applying contraction analysis to recurrent neural networks. This  
16 allowed us to find mechanisms for achieving stability in multiple connected networks  
17 with biologically realistic dynamics, including synaptic plasticity and time-varying inputs.  
18 These mechanisms included anti-Hebbian plasticity, synaptic sparsity and excitatory-  
19 inhibitory balance. We leveraged these findings to construct networks that could  
20 perform functionally relevant computations in the presence of noise and disturbance.  
21 Our work provides a blueprint for how to construct stable plastic and distributed  
22 networks.

23

## 24 2 Introduction

25

26 The brain is comprised of networks that are highly dynamic and noisy. Neural activity

27 fluctuates from moment to moment and varies considerably between experimentally

28 identical trials (Latimer et al., 2015; Lundqvist et al., 2016; 2018; Churchland et al.,

29 2011). These fluctuations can be due to a variety of factors including variability in

30 membrane potentials, inputs, plastic changes due to recent experience and so on. Yet,

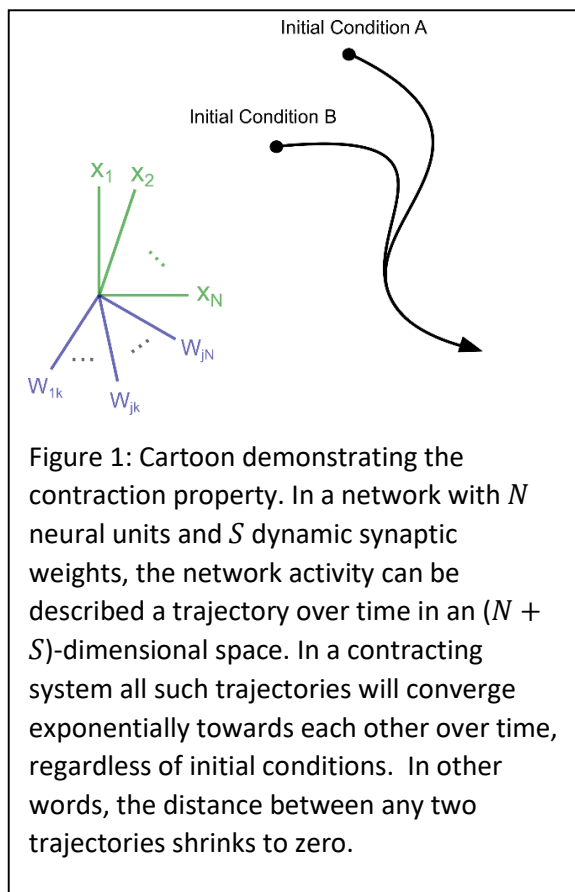

in spite of these fluctuations, networks must achieve computational stability. Despite being “knocked around” by different starting conditions and noise, networks must reach a highly consistent state for their computations to make sense.

The mechanisms that produce neural network stability have been characterized primarily in recurrent neural networks (RNNs)—a general form of brain network—in cases where the network weights are fixed and the input the network receives is

43 constant (Fang and Kincaid 1996; Dayan and Abbot 2005). These stability conditions

44 are bounds on the eigenvalues of the weight matrix and prevent networks from “blowing

45 up”, that is, from running away to high levels of excitation (Fang and Kincaid 1996;

46 Matsuoka 1992). This is an important finding but it is not the whole story. Eigenvalue

47 analysis of the weight matrix is only guaranteed to work in RNNs receiving constant

48 input and with fixed synaptic weights (or weights that change very slowly). Biological  
49 networks, however, have plastic synaptic weights that change rapidly under constant  
50 bombardment from environmental inputs.

51 Such “dynamic stability” can be studied using contraction analysis, a concept developed  
52 in control theory. Unlike a chaotic system where perturbations and distortions can be  
53 amplified over time, the population activity of a contracting network will converge  
54 towards the same trajectory, thus achieving stable dynamics (Figure 1). One way to  
55 understand contraction is to represent the state of a network at a given time as a point  
56 in the network’s ‘state-space’. A commonly used state-space in neuroscience is the  
57 space spanned by the possible firing rates of all the networks’ neurons. A particular  
58 pattern of neural firing rates corresponds to a point in this state-space. As the activity of  
59 each neuron changes, this point moves around and traces out a particular trajectory. In  
60 a contracting network, all such trajectories converge.

61 To examine how dynamic stability can be achieved with contraction under biologically  
62 realistic assumptions, we used RNNs that received time-varying inputs and had  
63 synapses that changed on biologically relevant timescales (Orhan and Ma 2019;  
64 Mongillo, Barak, and Tsodyks 2008; Lundqvist, Herman, and Lansner 2011). This  
65 revealed several classes of synaptic plasticity that naturally produced contraction,  
66 including anti-Hebbian plasticity and sparse connectivity. Further, stability is an  
67 emergent property, in the sense that two or more contracting systems can become  
68 chaotic when they interact (Ashby 2013; Lohmiller and Slotine 1998). Therefore, we  
69 also studied principles for connecting multiple networks in a way that preserved  
70 contraction as well as the functionality of each network. We then used these findings in

71 plastic RNNs to examine how networks can perform functionally relevant computations  
72 in the presence of noise and disturbance. These computations included context-  
73 dependent sensory integration and retaining stimuli in working memory. Thus, we  
74 uncovered principles for achieving and maintaining stability in complex, modular and  
75 plastic networks.

### 76 3 Results

77 We used two main quantitative tools to characterize contraction. One is the contraction  
78 *rate*, indicating how fast trajectories reconvene following a perturbation. Another is a  
79 network's Jacobian. The Jacobian of a dynamical system is a matrix essentially

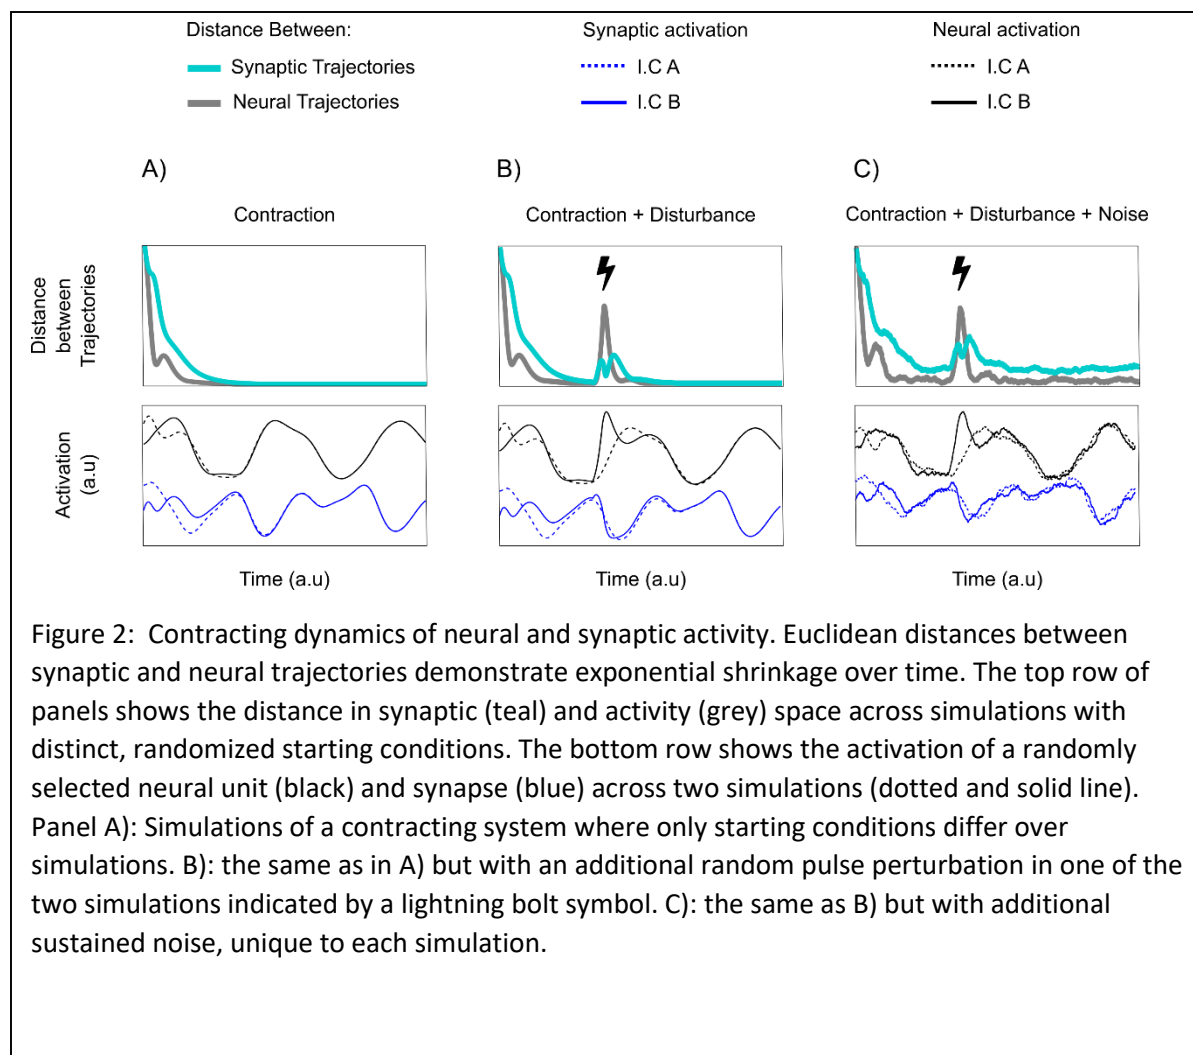

80 describing the local ‘traffic laws’ of nearby trajectories of the system in its state space.  
81 More formally, it is the matrix of partial derivatives describing how a change in any  
82 system variable impacts the *rate of change* of every other variable in the system. It was  
83 shown in (Lohmiller and Slotine 1998) that if the matrix measure—also known as the  
84 logarithmic norm (Söderlind 2006) – of the Jacobian is negative, then all nearby  
85 trajectories are funneled towards one another (see S.I 1.2 for technical details) which, in  
86 turn, implies that *all* trajectories are funneled towards one another.

### 87 3.1 Anti-Hebbian Dynamics Produce Contraction

88 Anti-Hebbian plasticity is the decrease of the mutual synaptic weights if the activity of  
89 two neurons are correlated. This has been observed across many brain regions and  
90 species (Hosoya, Baccus, and Meister 2005; Enikolopov, Abbott, and Sawtell 2018). It  
91 is believed to underlie important neural computations such as decorrelation of inputs  
92 (Földiák 1990). We found that anti-Hebbian plasticity produces contraction in a broad  
93 class of neural networks. Specifically, we considered neural networks of the following  
94 form:

$$95 \quad \dot{x}_i = h(x_i) + \sum_{j=1}^N W_{ij}x_j + u_i(t)$$

96 The term  $\dot{x}_i \equiv \frac{dx_i}{dt}$  denotes the change in the activation of neuron  $i$  as a function of time.  
97 The term  $h(x_i)$  captures the ‘self-dynamics’ of neuron  $i$  —the dynamics it would have in  
98 the absence of input from other neurons. The term being summed represents the  
99 weighted contribution of all the neurons in the network on the activity of neuron  $i$ .  
100 Finally, the term  $u_i(t)$  represents external input into neuron  $i$ .

101 To ensure our results would be applicable to many different networks, we did not  
102 constrain the inputs into the RNN (except that they were not infinite), and we did not  
103 specify the particular form of  $h(x_i)$  except that it be a leak term (see S.I 2.2 for what  
104 constitutes a leak term). Furthermore, we made no assumptions regarding the relative  
105 timescales of synaptic and neural activity—synaptic dynamics were treated on an equal

106 footing as neural dynamics. In particular, let  $x_i$  be the activity of neuron  $i$ , and let  
107  $W_{ij}$  denote the weight between neurons  $i$  and  $j$ , we considered anti-Hebbian synaptic  
108 plasticity of the following form:

109 
$$\dot{W}_{ij} = -k_{ij} x_i x_j - \gamma(t) W_{ij}$$

110 where the term  $k_{ij} > 0$  is the anti-Hebbian plasticity learning rate for each synapse and  
111  $\gamma(t) > 0$  is a decay factor (the rate of forgetting) for each synapse. For technical  
112 reasons outlined in the supplementary, we restricted  $\mathbf{K}$ , the matrix containing the  $k_{ij}$   
113 terms, to be positive-semidefinite, symmetric, and have positive entries. A particular  
114 example of  $\mathbf{K}$  satisfying these constraints is to have the learning rates of all synapses to  
115 be equal (i.e.  $k_{ij} = k > 0$ ). Plasticity of this form produced contracting neural and  
116 synaptic dynamics, regardless of the initial values of the weights and neural activity  
117 (Figure 2 and Figure 3). In particular, we found that even if an RNN is initially not  
118 contracting, it will become contracting when subject to anti-Hebbian plasticity (Figure 3).  
119 The red trace of Figure 3.a shows that this is not simply due to the weights decaying to  
120 0. Thus, anti-Hebbian plasticity is not only contraction preserving, it is contracting  
121 *ensuring*.

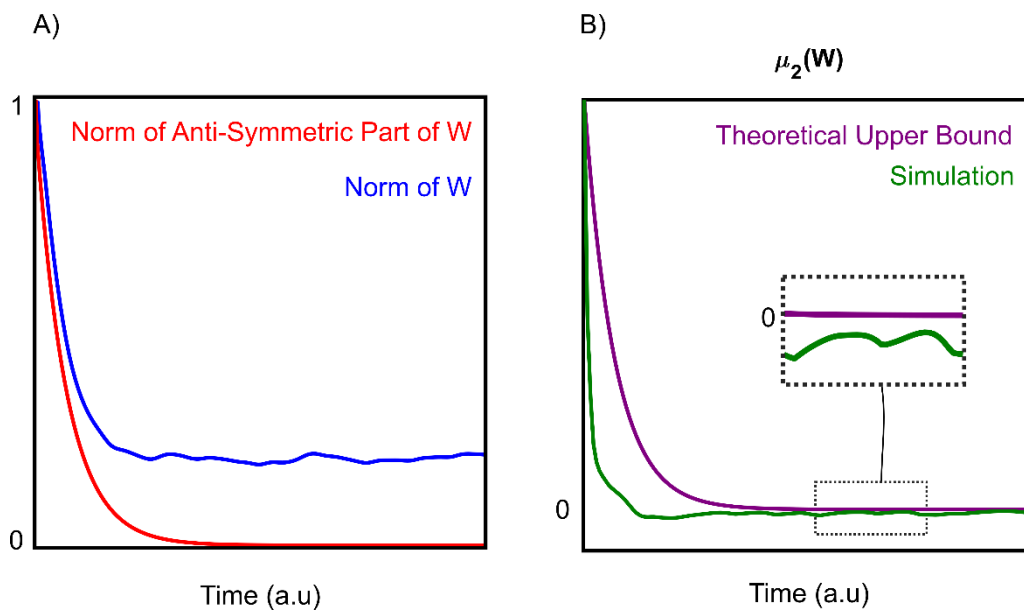

122

123 *Figure 3:(A, red trace) The anti-Hebbian plasticity pushes the weight matrix towards symmetry. A) Plotted is a*  
124 *measure (the norm) of how asymmetric the weight matrix is. Red curve shows that this measure decays to zero, implying the*  
125 *weight matrix becomes symmetric. The blue trace shows the sum of squares of all the elements in the weight matrix. If this*

126 *quantity does not decay to zero, it implies that not all the weights have decayed to zero. In (B), we plot the largest eigenvalue of*  
127 *the symmetric part of  $W(\mu_2)$ . A prerequisite for overall contraction in the network is that this quantity be less than or equal*  
128 *to the 'leak-rate' of the individual neurons. The purple line shows our theoretical upper bound for  $\mu_2$ , and the green shows*  
129 *the actual value of  $\mu_2$  taken from a simulation. The purple decays exponentially to zero. Since the green line stays below the*  
130 *purple line, we can conclude that  $\mu_2$  is always less than the leak-rate of the neurons after some finite time.*

131 To consider how anti-Hebbian plasticity works to produce contraction across a whole  
132 network, we needed to deal with the network in a holistic fashion, not by analyzing the  
133 dynamics of single neurons. To do so, we conceptualized RNNs with dynamic synapses  
134 as a single system formed by combining two subsystems—a neural subsystem and a  
135 synaptic subsystem. Contraction analysis of the overall system then boiled down to  
136 examining the interactions between these subsystems (Slotine 2003).

137 We found that anti-Hebbian plasticity works like an interface between these systems,  
138 producing several distinct effects that push networks toward contraction. First, it makes  
139 the synaptic weight matrix symmetric (Figure 3A, red trace). This means that the weight  
140 between neuron  $i$  to  $j$  is the same as  $j$  to  $i$ . We show this by using the fact that every  
141 matrix can be written as the sum of a purely symmetric matrix and a purely anti-  
142 symmetric matrix. An anti-symmetric matrix is one where the  $ij$  element is the negative  
143 of the  $ji$  element (*i.e.*  $W_{ij} = -W_{ji}$ ) and all the diagonal elements are zero. We then  
144 show that anti-Hebbian plasticity shrinks the anti-symmetric part of the weight matrix to  
145 zero—implying that the weight matrix becomes symmetric. Furthermore, anti-Hebbian  
146 plasticity makes the weight matrix negative semi-definite, meaning all its eigenvalues  
147 are less than or equal to zero (Figure 3A). Mathematically, we show that the symmetry  
148 of the weight matrix 'cancels out' off-diagonals in the Jacobian matrix (see S.I section 3)  
149 of the overall neural-synaptic system. Loosely, off-diagonal terms in the Jacobian  
150 represent potentially destabilizing cross-talk between the two subsystems. Combined  
151 with the fact that the weight matrix becomes negative semi-definite, the cancelling out of  
152 the Jacobian off-diagonals tends to funnel network dynamics towards a common path,  
153 thus producing contraction.

154

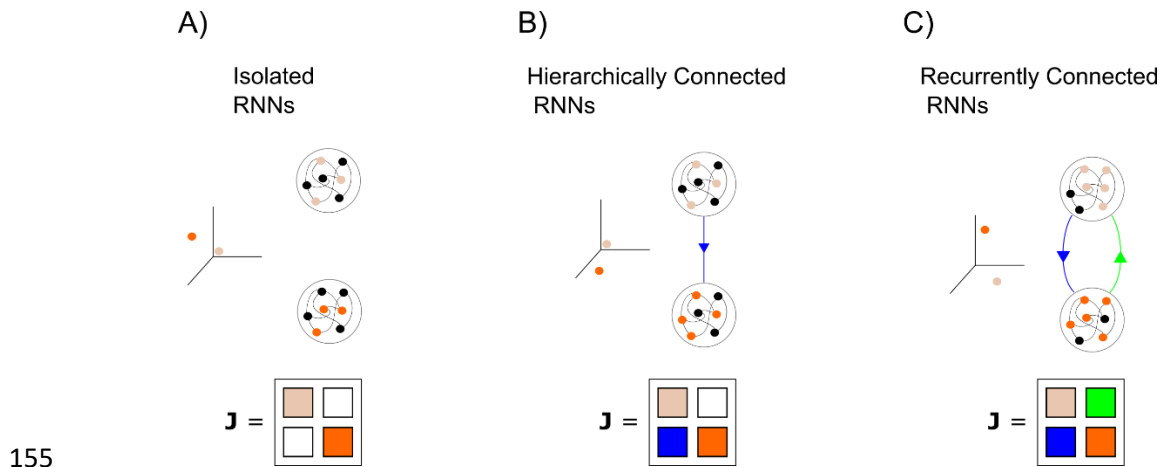

155

156 Figure 4: Combination properties of contracting systems. A) Two isolated, autonomous networks. The  
 157 Jacobian of the overall system is block diagonal B) If one of the systems is connected to the other in a  
 158 feedforward manner, the fixed point of the ‘bottom’ system will change, will the fixed point of the top  
 159 system remains the same. The Jacobian of the overall system is block-triangular. C) If the systems are  
 160 reciprocally connected, both systems fixed-points will change. The Jacobian is a 2 x 2 block matrix.

### 161 3.2 Sparse Connectivity Pushes Networks toward Contraction

162

163 Cortical synaptic connectivity is extraordinarily sparse. In the human neocortex there  
 164 are about 10,000 synapses per neuron. Given that there are about 20 billion neurons in  
 165 the human neocortex, this is roughly 17 orders of magnitude fewer synaptic connections  
 166 than if neocortical neurons were all-to-all connected ( $\frac{10^4}{(2 \cdot 10^{10})(2 \cdot 10^{10})} \approx 10^{-17}$ ). Even in  
 167 local patches of cortex, such as we model here, connectivity is far from all-to-all. Our  
 168 analyses revealed that sparse connectivity helps produce network contraction.

169 To account for the possibility that some synapses may have much slower dynamics  
 170 than others, and can thus be treated as constants, we make a distinction between the  
 171 total number of synapses and the total number of *dynamic* synapses. By dynamic  
 172 synapse we mean a synapse whose dynamics unfold on a timescale comparable to  
 173 neural dynamics. By neural dynamics we mean the change in neural activity as a  
 174 function of time. A very small change in activity over a given time window would indicate  
 175 a very long timescale; conversely, a very large change in activity would indicate a very  
 176 short timescale. We analyzed RNNs with the structure:



177

$$\dot{x}_i = h_i(x_i) + \sum_{j=1}^N W_{ij}(t) r(x_j) + u_i(t)$$

178 Where  $h_i(x_i)$  is a nonlinear leak term (see S.I section 2 for definition), and  $r(x_j)$  is a  
179 nonlinear activation function. The RNNs analyzed in this section are identical to those  
180 analyzed in the previous section, with the exception of the activation term. Here we  
181 allow for a more general class of activations, whereas in the previous section we  
182 constrained  $r(x_j)$  to be linear, for analytical tractability. We denote the total number of  
183 afferent synapses into neuron  $i$  by  $p_i$  and the number of afferent *dynamic* synapses by  
184  $d_i$ . Since the number of dynamic synapses cannot be greater than the total number of  
185 synapses,  $d_i$  has to be a fraction of  $p_i$ , This means we can write it as  $d_i = \alpha_i p_i$ , where  
186  $\alpha_i$  is a number between 0 and 1. We refer to the maximum possible absolute strength of  
187 a synapse as  $w_{max}$ , the maximum possible firing rate of a neuron as  $r_{max}$  and finally the  
188 contraction rate of the  $i^{th}$  isolated neuron as  $\beta_i$ . Recall from the introduction that the  
189 contraction rate measures how quickly the trajectories of a contracting system  
190 reconvene after perturbation. Under the assumption that the synapses are contracting,  
191 we show in the supplementary materials (Section 4) that if the following equation is  
192 satisfied for every neuron, then the overall network is contracting:

193

$$p_i(g_{max}w_{max} + \alpha_i r_{max}) < \beta_i$$

194 Where  $g_{max}$  is the maximum gain of any neuron in the network (see S.I section 4).  
195 Because  $\beta_i$  is a positive number, it is always possible to decrease  $p_i$  to the point where  
196 this equation is satisfied. Since increasing the sparsity of a network has the effect of  
197 decreasing  $p_i$ , we may conclude that increasing the sparsity of connections pushes the  
198 system in the direction of contraction. This equation also implies that the faster the  
199 individual neurons are contracting (i.e. the larger  $\beta$  is), the denser you can connect them  
200 with other neurons while still preserving overall contraction.

### 201 3.3 E-I Balance Leads to Contraction in Static RNNs

202 Apart from making connections sparse, one way to ensure contraction is to make  
203 synaptic weights small. This can be seen for the case with static synapses by setting  
204  $\alpha_i = 0$  in the section above. Intuitively, this is because very small weights mean that

205 neurons cannot exert much influence on one another. If the neurons are stable before  
206 interconnection, they will remain so. Since strong synaptic weights are commonly  
207 observed in the brain, we were more interested in studying when contraction can arise  
208 irrespective of weight amplitude. Negative and positive synaptic currents are  
209 approximately balanced in biology (Mariño et al. 2005; Wehr and Zador 2003; Shu,  
210 Hasenstaub, and McCormick 2003). We reasoned that such balance might allow much  
211 larger weight amplitudes while still preserving contraction. This was indeed the case.

212 To show this, we studied the same RNN as in the section above, while assuming  
213 additionally that the weights are static. In particular, we show in the supplementary  
214 (section 5) that contraction can be assessed by studying the eigenvalues of the  
215 *symmetric* part of  $\mathbf{W}$  (i.e.  $\frac{\mathbf{W}+\mathbf{W}^T}{2}$ ). This implies the following: if excitatory to inhibitory  
216 connections are of equal amplitude (and opposite sign) as inhibitory to excitatory  
217 connections, they will not interfere with stability—regardless of amplitude (see S.I  
218 Section 5). This is because connections between inhibitory and excitatory units will be in  
219 the off-diagonal of the overall weight matrix and get cancelled out when computing the  
220 symmetric part. As an intuitive example, consider a two-neuron circuit made of one  
221 excitatory neuron and one inhibitory neuron connected recurrently (as in (Murphy and  
222 Miller 2009), Fig 1A). Assume that the overall weight matrix has the following structure:

$$223 \quad \mathbf{W} = \begin{pmatrix} w & -w \\ w & -w \end{pmatrix}$$

224 When taking that symmetric part of this matrix, the off-diagonal elements cancel out—  
225 leaving only the diagonal elements to consider. Since the eigenvalues of a diagonal  
226 matrix are simply its diagonal elements, we can conclude that if the excitatory and  
227 inhibitory subpopulations are independently contracting ( $w$  is less than the contraction  
228 rate of an isolated neuron), then overall contraction is guaranteed. It is straightforward  
229 to generalize this simple two-neuron example to circuits achieving E-I balance through  
230 interacting *populations* (see Supp Section 5). It is also straightforward to generalize to  
231 the case where E-I and I-E connections do not cancel out exactly neuron by neuron, but  
232 rather they cancel out in a statistical sense where the mean amplitudes are matched  
233 (Supp Section 5).

234 Thus far, we have described several sufficient conditions that ensure contracting  
235 dynamics in networks made of dynamic neurons and synapses. A key question is: *Can*  
236 *contracting dynamics be used to perform useful neural computations?* In the following  
237 sections we investigate the computational aspects of contracting networks.

### 238 3.4 Echo-State Networks Are Special Cases of Contracting RNNs

239 As can be seen in Figure 2.b, contracting systems have ‘fading memories’. This means  
240 that past events will affect the current state, but that the impact of a transient  
241 perturbation gradually decays over time. Consider the transient input in Figure 2.b  
242 (black lightning bolt) presented on only one of the two trials to the network. Because the  
243 input is only present on one trial and not the other, we call it a disturbance. Once this  
244 disturbance is presented, the distance between the trajectory corresponding to one trial  
245 and the trajectory corresponding to the other trial grows, meaning that they start to  
246 behave differently. However, after the disturbance is removed, the distance between the  
247 network’s trajectories starts shrinking back to zero again, meaning that the trajectories  
248 behave similarly.

249 Thus, the network does not hold onto the memory of the disturbance indefinitely—the  
250 memory fades away. A similar property has been used in Echo State Networks (ESNs)  
251 to perform useful brain-inspired computations (Jaeger 2001; Pascanu and Jaeger).  
252 These networks are an alternative to classical attractor models in which neural  
253 computations are performed by entering stable states rather than by ‘fading memories’  
254 of external perturbations (Buonomano and Maass 2009) . Because of the ‘fading  
255 memory’ property displayed by our contracting systems, we suspected that they might  
256 be related to ESNs. We investigated this next.

257 There are several distinctions between the networks described here and ESNs: 1)  
258 ESNs are discrete-time dynamical systems. This means that their states do not evolve  
259 continuously with time, but rather in ‘steps’. We consider continuous time networks  
260 here. While attempts have been made to find ‘Echo-State Properties’ for leaky-  
261 integrator RNNs, these have all relied on discretization of the continuous dynamics. 2)  
262 ESNs don’t have dynamic synapses and 3) The ESN ‘metric’ (which measures  
263 distances in state space) is not allowed to be time-varying. This means that the

264 “yardstick” by which distances are measured in an ESNs state space never change,  
265 thus limiting the scope of networks classifiable as ESNs. However, by removing  
266 dynamic synapses, setting the metric we use to prove contraction equal to the identity  
267 metric, and switching to a discrete time RNN, we could derive the so-called ‘Echo state  
268 condition’ as a special case of the contracting networks considered here (see S.I  
269 section 5). It therefore follows that all the useful neural computations that have been  
270 performed by ESNs can automatically be performed by special instances of the  
271 networks considered in our work. However, by working within the framework of  
272 contraction analysis we were able to study networks both with dynamic synapses and  
273 non-stationary metrics. This allowed for greater complexity in the network dynamics  
274 while preserving the “fading memory” property. Next, we demonstrate how this  
275 additional freedom and complexity of dynamic RNNs can be applied to known problems  
276 in neuroscience.

### 277 3.5 Inter-areal Coupling Controls Operating Point

278 Neural responses to distinct stimuli or contexts should be separable from one another to  
279 enable downstream readout (Rigotti, et al., 2013). This is often determined by first  
280 averaging activity across time and trials for each experimental condition and then  
281 attempting to separate the averages linearly with hyperplanes. However, increasing  
282 evidence suggests that neural activity is highly dynamic variable from moment-to-  
283 moment and trial-to-trial (Lundqvist, et al., 2016; Wei, Inagaki, Li, Svoboda, &  
284 Druckmann, 2019; Denfield, Ecker, Shinn, Bethge, & Tolias, 2018). Therefore, it is  
285 neural *dynamics* that should be separable, not just averaged activity. The brain, after  
286 all, works in real time—not by averaging. One way to achieve context-dependent  
287 separation is by constraining the neural dynamics corresponding to a particular  
288 experimental condition to exist inside a ball of some radius around a point in state  
289 space. By moving these points—which we will call neural operating points—sufficiently  
290 far apart, one can potentially ensure that the neural dynamics do not overlap and thus  
291 ensure they are linearly separable. We therefore tested if networks considered here can  
292 guarantee linear downstream readout via contextual control of neural operating points.

293 There are at least two ways to control neural operating points in a contracting system:  
294 1) By injecting tonic input; 2) By changing the network structure. Tonic input has been

295 used in models of neural dynamics (Remington, Narain, Hosseini, & Jazayeri, 2018;  
296 Mante, Sussillo, Shenoy, & Newsome, 2013). A persistent, contextual cue  
297 (corresponding to a rule or task demand) can provide this tonic input. We observed that  
298 it shifts the neural operating point of a contracting system to a new location by shifting  
299 the “bottom” of the basin of attraction to a new location in state space (Supp Section 6).  
300 We also found that if a time-varying stimulus is then presented on top of a tonic input,  
301 the resulting neural dynamics will be contained in a sphere around the new operating  
302 point (see S.I section 6 for derivation of the radius of this sphere). This is a  
303 manifestation of the fact that a contracting system remains contracting for any (non-  
304 infinite) input.

305 Another way to control the neural operating point is by varying the connection strength  
306 between *coupled* contracting networks (Figure 4). We leverage the fact that it is  
307 possible for a single contracting system to connect to an arbitrary number of other  
308 contracting systems while automatically preserving contraction of the overall system  
309 (Figure 5) (Slotine 2003). Contraction is preserved but the dynamics and activity of the  
310 networks change to a degree determined by the strength of the connections between  
311 the networks. Thus, changing the changing the degree of coupling between the  
312 networks can systemically control the neural operating point of both networks (Figure 5).

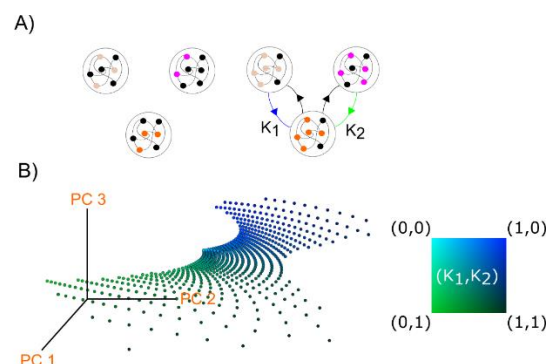

313

314 Figure 5: Operating point control by modulation of inter-areal connectivity. A) Left: three isolated,  
315 autonomous contracting systems. Since they are isolated, their fixed points do not depend on one  
316 another. Right: by connecting these systems, their fixed points move. B) Left: by modulating the  
317 strength of connections ( $k_1, k_2$ ) from the two networks at the top, the fixed point of the bottom  
318 network was systematically changed. Right: the fixed points of the bottom network were plotted in  
319 space spanned by the first three principal components colored according to the value of  $(k_1, k_2)$ .

### 320 3.6 Combining Contracting Networks Produces a Hierarchy of Time Constants

321 Elevated spiking to external stimuli is gradually prolonged as one traverses the cortical  
322 hierarchy from early sensory cortex to frontal cortex (Wasmuht, Spaak, Buschman,  
323 Miller, & Stokes, 2018; Murray J. , et al., 2014). It has been suggested that shorter  
324 timescales in sensory cortex enable rapid detection of changing stimuli, while longer  
325 timescales in frontal cortex promote integration of information over time. It is not known  
326 how this hierarchical gradient is achieved. Simulations of a large-scale cortical model  
327 suggested that this is due to a gradient of increasing synaptic excitation as well as  
328 recurrent connections (Chaudhuri, Knoblauch, Gariel, Kennedy, & Wang, 2015). Here,  
329 we show instead that hierarchically combining contracting networks naturally gives rise  
330 to gradually longer time-constants of neural activity (Figure 6A). In other words, it is not  
331 strictly necessary to change the properties of the neurons to get longer time constants—  
332 it may arise from the global connectivity scheme. We therefore investigated if controlling  
333 connectivity could flexibly control the time-scale neural integration.

334 First, suppose that a number of contracting subsystems are connected hierarchically.  
335 By hierarchically, we mean that while the connections *within* a subsystem can be  
336 recurrent, the connections *between* subsystems remain strictly feedforward. Our only  
337 restriction on the feedforward connectivity is that it is upper bounded in magnitude.  
338 Denote the number of subsystems as  $D$ . We found that the integration time of this  
339 network can scale with  $m^D$ , where  $m > 1$ , which in general grows with the strength of  
340 feedforward connectivity (see S.I section 7). Thus, even with mild feedforward  
341 connectivity strength and a few connected networks, one can get considerable  
342 increases in integration times in the higher areas. It is important to note that our results  
343 are based on upper bounds. While the integration time of this hierarchical network *can*  
344 scale exponentially with the number of subsystems, it does not have to. In practice, we  
345 did observe considerably increased information retention (almost two orders of  
346 magnitude greater than the neural time constant) in simulations as you go higher up in  
347 the hierarchy (Figure 6A), which is in agreement with experimental observations  
348 (Murray J. , et al., 2014).

349 The cortex, of course, also has long-range feedback projections. Thus, we also  
350 explored the relation of feedback connectivity to integration times. In particular, we  
351 considered a model of interactions between sensory and frontal cortex. Both cortical  
352 areas were modelled by a contracting network, each with the same contraction rate, that  
353 we connected reciprocally (see S.I section 7). The strength of the feedback was  
354 determined by the positive parameter  $k$ , and gradually varied. We measured the  
355 timescales of the two networks by briefly presenting input into the sensory network and  
356 tracking how much information (Olejnik and Algina 2003) about the stimulus was  
357 retained in the network dynamics. A similar analysis as in the strictly feedforward case  
358 (above) showed that that decreasing  $k$  (weakening top-down feedback) leads to longer  
359 integration (Supp section 7). This was confirmed with simulations (Figure 6B). In other  
360 words, the level of time-integration was controlled by the level of top-down feedback.  
361 Consistent with the above results, the frontal network retained stimulus information for  
362 longer than the sensory cortex network despite the two networks having the same  
363 contraction rate. Both these results together show that longer integration times emerge  
364 naturally out of connecting contracting systems. Further, the time constant of the  
365 integration can be controlled by controlling feedback.

366

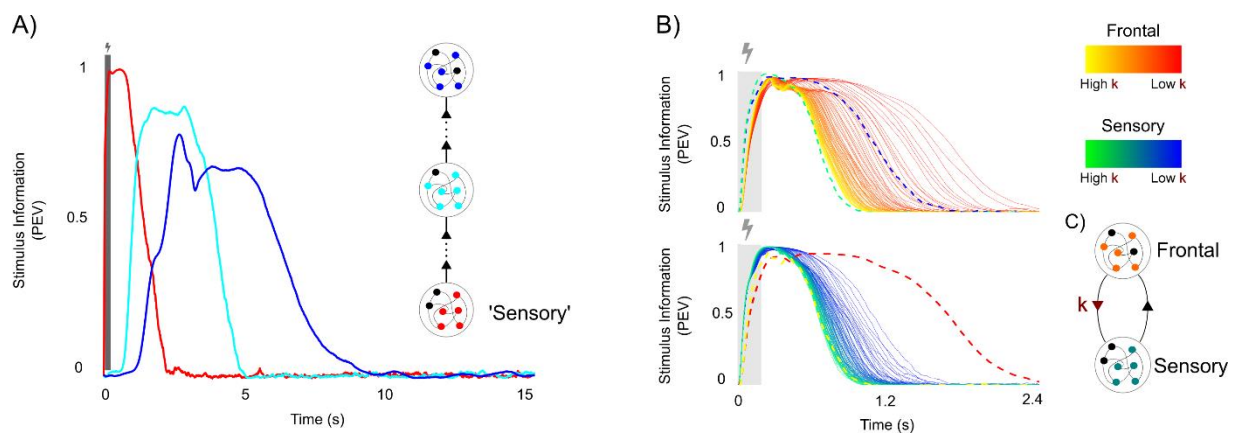

367

368 *Figure 6. Control of time-integration by combinations of contracting systems. A) Control of integration time-constant by position*  
369 *in hierarchy. Hierarchical combinations of contracting systems show prolonged integration times, increasing with their position*  
370 *in the hierarchy. B) Modulation of top-down gain. Two networks with identical contraction rates (but different weight matrices)*  
371 *were reciprocally connected. The 'sensory' network could receive external inputs. Feedforward connections from the 'sensory' to*  
372 *the frontal network were held fixed. The top-down connections from frontal to sensory were gradually decreased in strength*  
373 *from  $k=1$  towards 0, leading to a gradual increase in asymmetry in the inter-areal connectivity. For each  $k$ , external stimulus (3*  
374 *different stimuli, each repeated over 100 trials) were provided to the 'sensory' network at  $t=0$  (lightning bolt/grey box). Using*

375 *percentage explained variance (PEV), the average time-course of stimulus information in the units' activity was measured in*  
376 *both networks as a function of the asymmetry (color coded). With reduced  $k$ , the time-scale of sensory integration was*  
377 *prolonged, in particular in the frontal network (the dotted yellow/red lines in the sensory plot shows the two most extreme*  
378 *values of the above frontal plot for comparison).*

### 379 3.7 Stable Working Memory via Hybrid Contracting Systems

380 As discussed in section 3.4, contracting networks may be thought of as having a  
381 memory that fades with a characteristic time constant  $\lambda$  (a “decay constant”). There are  
382 many cases, however, where information has to be retained over gaps in time longer  
383 than  $\lambda$  (e.g., working memory tasks where memories much be held for seconds). This  
384 can be accomplished via *hybrid* contracting systems.

385 A hybrid dynamical system is one that is governed by the continuous evolution of  
386 variables (i.e., the type of model discussed so far) but also includes discrete transitions  
387 in synaptic weight changes (El Rifai & Slotine, 2006). These discrete transitions of  
388 synaptic weights have to be coordinated. This could be accomplished by a threshold or  
389 an “update” signal that, for example, changes synaptic weights only at given periods of  
390 time, mimicking the effect of dopamine (Lansner et al. 2013). Here, we report that the  
391 resulting hybrid contracting system can have both stable dynamics and retain memories  
392 that outlast shorter decay constants.

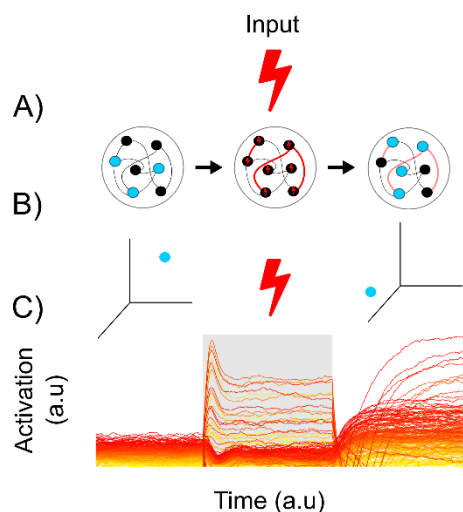

393

394 *Figure 7: Synaptic working memory in hybrid contracting systems. The network has anti-Hebbian synaptic plasticity. (A) Left: In*  
395 *the absence of inputs the system has a stable fixed-point as seen in the cartoon (middle row) and neural activity (last row)*  
396 *sorted from most (red) to least (yellow) active unit. Middle: An input is presented to the network (grey background, lightning*  
397 *bolt), causing its activity to jump to a different fixed point, partly determined by the structure of the input. The synaptic weights*  
398 *are frozen and the input is removed. This causes the network to contract towards a new fixed-point that is informative of the*  
399 *now removed input.*



400 Consider a contracting neural network with dynamic synapses, as outlined in section  
401 3.1. Recall that there can be separate decay constants for synapses vs neurons. Now  
402 present an input to the system. After transients, the system settles down to a new  
403 equilibrium state different from that before the input. Imagine that the weights are frozen  
404 at this new equilibrium (or the synaptic decay is much slower than the neural decay). In  
405 other words, synaptic weights are only updated when there are inputs to the network  
406 much like the stimulus-driven dopamine-mediated “print now” signal used in prior work  
407 (Lansner, Marklund, Sikström, & Nilsson, 2013). The network with frozen weights is still  
408 contracting but the equilibrium point it contracts to is different from that of the pre-  
409 stimulus network (Figure 7). In line with experimental findings (Spaak, Watanabe,  
410 Funahashi, & Stokes, 2017; Murray J. , et al., 2017), the resulting activity of neurons are  
411 highly dynamic during stimulus presentation and the beginning of the delay, but  
412 gradually slows down towards a new stable equilibrium point later in the delay.

413 This shows how memories in networks can outlast the neural decay constant. We show  
414 in the next section how combining this memory storage with hierarchically organized  
415 networks with increasing time constants can solve a fundamental problem of cognition:  
416 context-dependent behavior.

### 417 3.8 Context Dependent Behavior

418 Here, we construct a contracting network combining features discussed in the previous  
419 sections. We show that it can exhibit context-dependent behavior, a hallmark of  
420 cognition. Context-dependent means that behavior can change depending on the  
421 situation. We behave differently at a jazz show vs a punk show.

422 We combined two contracting networks: A “dynamic” network with changing synaptic  
423 weights (as discussed in section 3.7) and a “static” sensory network (Figure 8). The  
424 dynamic network was identical to the one used in Figure 7. The sensory network was  
425 set up in order to be contracting but entailed no further tweaking beyond that. We  
426 simulated the following task. At the beginning of the trial, the dynamic network was  
427 presented with one of two transient cues that instruct whether to attend to color or  
428 motion. Following a brief memory delay, the sensory network was then presented with a  
429 combined noisy color and motion stimulus and has to make a decision about the cued

430 modality (i.e. report either the color or motion of the dots). The output of the network  
431 was a linear readout taken from the sensory network, trained to minimize the error  
432 between desired output and network output.

433 The combined networks solved the task by holding the cued modality in the network  
434 with dynamic synapses, which changed the neural operating point of the sensory  
435 network (Figure 8). This demonstrates that the properties of multiple distinct contracting  
436 systems can be combined without any fine-tuning. It also illustrates that because  
437 contracting systems have one trajectory towards which they converge, any readout  
438 (linear or nonlinear, provided that the derivative of the readout is bounded) will *also*  
439 converge (Slotine 2003). In other words, the readout is easy to read because it is  
440 linearly separable and consistent regardless of initial network conditions or noise. For  
441 this reason, we could add substantial noise to the sensory network without loss of  
442 function (Figure 8).

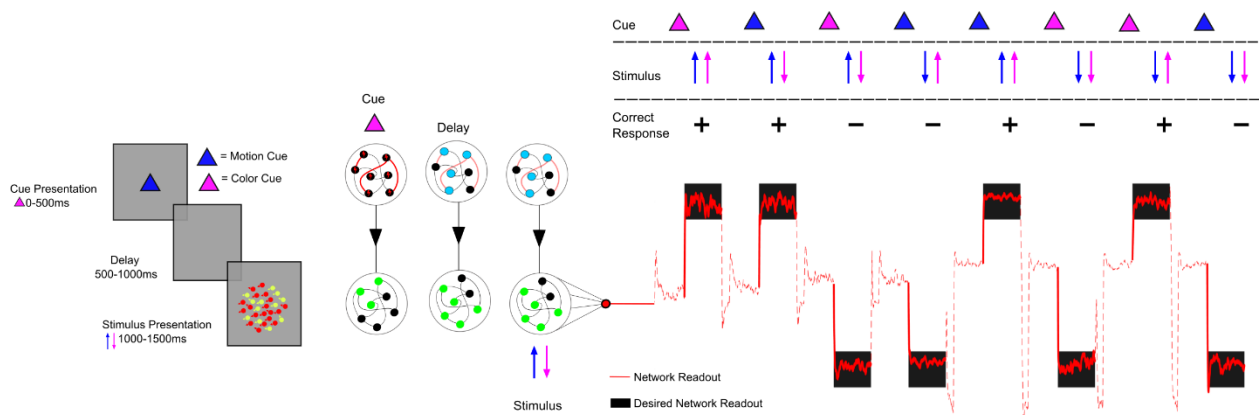

443

444 *Figure 8: Context dependent sensory integration. A) Task design: in the task there is either a motion or color cue presented,*  
445 *indicating which sensory feature to pay attention to. Following a delay, sensory information is presented, and only the cued*  
446 *feature should dictate the response (left or right) of the network. B) Network setup: the network at the top has plastic synapses,*  
447 *such that it can retain the cued information, same as in Figure 6. Due to the top down connections to the sensory area the cue*  
448 *held in working memory provided contextual modulation. The operating point of the network thus changed with the cued*  
449 *context. As a result, linear read out C) could be used to make the correct response for the 8 possible trial conditions (2 cues,*  
450 *motion indicating left/right, color indicating left/right).*

## 451 4 Discussion

452

453 We studied a fundamental question in neuroscience: how distributed neural circuits

454 maintain stable computations in the presence of disturbance, noisy inputs and plastic

455 change. Neurological systems have high levels of dynamical variability even between

456 trials with identical conditions, yet produce stable behavior. We approached this  
457 problem from the perspective of dynamical systems theory, in light of the recent  
458 successes of understand neural circuits as dynamical systems (Sussillo 2014). We  
459 focused on *contracting* dynamical systems, which are yet largely unexplored in  
460 neuroscience. We did so for three reasons:

461 1) Contracting networks can be *input-driven*. This is important because neural circuits  
462 are typically bombarded with time-varying inputs either from the environment or from  
463 other brain areas. Previous stability analyses have focused primarily on the stability of  
464 RNNs without time-varying input. These analyses are most insightful in situations where  
465 the input into a circuit can be approximated as either absent or constant. However,  
466 naturalistic stimuli tend to be highly time-varying and complex (Steveninck et al. 1997).  
467 This allowed us to build input-driven networks that performed stable computations on  
468 time-varying inputs.

469 2) Contracting networks are robust to noise and disturbances. Perturbations to a  
470 contracting system are forgotten at the rate of the contraction and noise therefore does  
471 not stack up over time. Thus dynamic stability can co-exist with high trial-to-trial  
472 variability in contracting neural networks, as observed in biology.

473 3) Contracting networks can be combined with one another in ways that preserve  
474 contraction. This is not true of most dynamical systems which can easily ‘blow up’ when  
475 connected in feedback with one another (Ashby 2013). This combination property is  
476 important as it is increasingly clear that cognitive functions such as working memory or  
477 attention are distributed in multiple cortical and sub-cortical regions (Chatham and  
478 Badre 2015; Halassa and Kastner 2017). In particular, prefrontal cortex has been

479 suggested as a hub that can reconfigure the cortical effective network based on task  
480 demands (Miller and Cohen 2001). Brain networks must therefore be able to effectively  
481 reconfigure themselves on a fast time-scale without loss of stability. We show how to  
482 achieve this automatically with contracting networks. Most attempts in modelling  
483 cognition, for instance working memory, tend to utilize single and often autonomous  
484 networks. Contracting networks display a combination of input-driven and autonomous  
485 dynamics, and thus have key features necessary for combining modules into flexible  
486 and distributed networks.

487 To understand what mechanisms lead to contraction in neural circuits, we applied  
488 contraction analysis to RNNs. For RNNs with static weights, we found that the well-  
489 known Echo State Networks are a special case of a contracting network. Since realistic  
490 synapses are complex dynamical systems in their own right, we went one step further  
491 and asked when neural circuits with dynamic synapses would be contracting. We found  
492 that anti-Hebbian plasticity and synaptic sparsity both lead to contraction in a broad  
493 class of RNNs. Anti-Hebbian plasticity exists across many brain areas and species,  
494 such as salamander and rabbit retina (Hosoya, Baccus, and Meister 2005), rat  
495 hippocampus (Lisman 1989; Kullmann and Lamsa 2007), electric fish electrosensory  
496 lobe (Enikolopov, Abbott, and Sawtell 2018) and mouse prefrontal cortex (Ruan, Saur,  
497 and Yao 2014). These dynamics can give rise to sparse neural codes which decrease  
498 correlations between neural activity and increase overall stimulus representation in the  
499 network (Földiák 1990). Because of this on-line decorrelation property, anti-Hebbian  
500 plasticity has also been implicated in predictive coding (Hosoya, Baccus, and Meister  
501 2005; Enikolopov, Abbott, and Sawtell 2018).

502 For synaptic plasticity that is not necessarily anti-Hebbian, we showed (in section 3.2)  
503 that in general, synaptic sparsity pushes RNNs towards being contracting. This aligns  
504 well with the experimental observation that synaptic connectivity is typically extremely  
505 sparse in the brain. Our results suggest that sparsity may be one factor pushing the  
506 brain towards contractive behavior. It is therefore interesting that synapses are  
507 regulated by homeostatic processes where synapses neighboring an upregulated  
508 synapse are immediately downregulated (El-Boustani et al. 2018). On the same note,  
509 we also observed that balancing the connections between excitatory and inhibitory  
510 populations leads to contraction. Balance between excitatory and inhibitory inputs are  
511 often observed in biology (Mariño et al. 2005; Wehr and Zador 2003; Shu, Hasenstaub,  
512 and McCormick 2003), and could thus serve contractive stability purposes. Related  
513 computational work on spiking networks has suggested that balanced synaptic currents  
514 leads to fast response properties, efficient coding, increased robustness of function and  
515 can support complex dynamics related to movements (Denève and Machens 2016;  
516 Hennequin, Vogels, and Gerstner 2014; Lundqvist, Compte, and Lansner 2010; Brunel  
517 2000).

518 We used the anti-Hebbian plasticity to build a working memory network where inputs  
519 were retained at a time-scale much longer than the contraction rate. The outcome of the  
520 plastic changes induced by a stimulus were frozen into the network and forced the  
521 network to converge towards a new trajectory unique to that input. As a result, activity  
522 was highly dynamic during input but stabilized exponentially and reached a stable  
523 plateau a few hundred millisecond later. Similar dynamics have been observed in  
524 spiking activity of recorded populations during working memory tasks in non-human

525 primates. In addition, individual units displayed rich dynamics with time-varying  
526 selectively, as also observed experimentally (Barak, Tsodyks, and Romo 2010; Warden  
527 and Miller 2010). Earlier computational studies have also suggested a role for synaptic  
528 plasticity in working memory (Sandberg, Tegnér, and Lansner 2003; Mongillo, Barak,  
529 and Tsodyks 2008; Lundqvist, Herman, and Lansner 2011, 2012; Fiebig and Lansner  
530 2017), but not within the framework of dynamic stability.

531 The combination properties of these systems allowed us to combine the functionalities  
532 of local neural circuits in simple ways to solve various simulated cognitive tasks with  
533 essentially no fine-tuning. In particular, we combined all the above properties to  
534 construct a modular network that solved a context-dependent sensory integration task.  
535 The network was noise tolerant and required no tuning, illustrating the ease with which  
536 one can build up complex functionalities from simpler ones using contracting networks.

537 Further, we defined the neural operating point of a contracting RNN as the point around  
538 which all its trajectories are bounded. We found that by modulating the strength of  
539 connection between combined contracting systems or by the injection of tonic input into  
540 a contracting network one could shift this operating point. This enables separation of  
541 neural trajectories. Linear separation has been discussed as an important feature of  
542 higher cognition (Rigotti et al. 2013). There is recent experimental evidence suggesting  
543 that weight matrix modulation and tonic input modulation indeed exists and may be  
544 thalamic in origin (Rikhye, Gilra, & Halassa, 2018).

545 We found that combining identical contracting RNNs hierarchically automatically  
546 produced a gradient of time-constants. Such gradient has been observed in cortex  
547 (Murray et al. 2014). Current models account for this phenomenon through a cortical

548 gradient in synaptic time-constants, in other words, by imposing the gradient. We found  
549 that increasing time constants automatically occurs when connecting contracting  
550 networks into a hierarchy. This makes it broadly applicable and flexible with respect to  
551 biological detail. Furthermore, our analysis revealed that the timescales of neural  
552 computation to be regulated in a robust and stable way simply by changing the amount  
553 of inter-area top-down feedback. This opens the possibility that the integration to be  
554 controlled by cognitive processes such as attention.

555 Experimental neuroscience is moving in the direction of studying many interacting  
556 neural circuits simultaneously. We therefore anticipate that the presented work can  
557 provide a useful foundation for how cognition in noisy and distributed computational  
558 networks can be understood.

### 559 Acknowledgments

560 We thank Pawel Herman for comments on an earlier version of this manuscript. We  
561 thank Michael Happ and all members of the Miller Lab for helpful discussions and  
562 suggestions. We thank Charles Shvartsman for code used in section 3. This work was  
563 supported by NIMH R37MH087027, ONR MURI N00014-16-1-2832, NSF 1809314, and  
564 The MIT Picower Institute Innovation Fund.

## 565 5 Bibliography

566 Abbott, L., & Nelson, S. (2000, 11 1). Synaptic plasticity: taming the beast. *Nature Neuroscience*, 3, 1178.

567 Abbott, L., & Regehr, W. (2004). *Synaptic computation*.

568 Britten, K., Shadlen, M., Newsome, W., & Movshon, J. (1992). The analysis of visual motion: a  
569 comparison of neuronal and psychophysical performance. *Journal of Neuroscience*, 12(12),  
570 4745-4765.

571 Chaudhuri, R., Knoblauch, K., Gariel, M., Kennedy, H., & Wang, X. (2015). A Large-Scale Circuit  
572 Mechanism for Hierarchical Dynamical Processing in the Primate Cortex. *Neuron*.

- 573 Cueva, C., Marcos, E., Saez, A., Genovesio, A., Jazayeri, M., Romo, R., . . . Fusi, S. (2019, 1 1). Low  
574 dimensional dynamics for working memory and time encoding. *bioRxiv*, 504936.
- 575 Denfield, G., Ecker, A., Shinn, T., Bethge, M., & Tolias, A. (2018). Attentional fluctuations induce shared  
576 variability in macaque primary visual cortex. *Nature communications*, 9(1), 2654.
- 577 El Rifai, K., & Slotine, J. (2006). Compositional contraction analysis of resetting hybrid systems. *IEEE*  
578 *Transactions on Automatic Control*.
- 579 Goldman, M., Compte, A., & Wang, X. (2010). Neural integrator models. In M. Goldman, A. Compte, & X.  
580 Wang, *Encyclopedia of neuroscience* (pp. 165-178). Elsevier Ltd.
- 581 Halassa, M., & Kastner, S. (2017). Thalamic functions in distributed cognitive control. *Nature*  
582 *neuroscience*, 20(12), 1669-1679.
- 583 Hennequin, G., Vogels, T., & Gerstner, W. (2014). Optimal control of transient dynamics in balanced  
584 networks supports generation of complex movements. *Neuron*, 82(6), 1394-1406.
- 585 Jaeger, H. (2001). The “echo state” approach to analysing and training recurrent neural networks-with  
586 an erratum note. *Bonn, Germany: German National Research Center for Information Technology*  
587 *GMD Technical Report*, 148(34), 13.
- 588 Kandel, E., Schwartz, J., Jessell, T., Jessell, D., Siegelbaum, S., & Hudspeth, A. (2000). *Principles of neural*  
589 *science* (Vol. 4). McGraw-hill New York.
- 590 Khalil, H., & Grizzle, J. (2002). *Nonlinear systems* (Vol. 3). Prentice hall Upper Saddle River, NJ.
- 591 Lansner, A., Marklund, P., Sikström, S., & Nilsson, L.-G. (2013). Reactivation in working memory: an  
592 attractor network model of free recall. *PLoS one*, 8(8), e73776.
- 593 Lohmiller, W., & Slotine, J.-J. (1998). On Contraction Analysis for Nonlinear Systems . *Automatica*, 683-  
594 696.
- 595 Lohmiller, W., & Slotine, J.-J. (n.d.). *On Contraction Analysis for Nonlinear Systems Analyzing stability*  
596 *differentially leads to a new perspective on nonlinear dynamic systems*.
- 597 Lundqvist, M., Herman, P., & Lansner, A. (2011). Theta and gamma power increases and alpha/beta  
598 power decreases with memory load in an attractor network model. *Journal of Cognitive*  
599 *Neuroscience*.
- 600 Lundqvist, M., Rose, J., Herman, P., Brincat, S., Buschman, T., & Miller, E. (2016). Gamma and Beta  
601 Bursts Underlie Working Memory. *Neuron*, 90(1), 152-164.
- 602 Mante, V., Sussillo, D., Shenoy, K., & Newsome, W. (2013). Context-dependent computation by  
603 recurrent dynamics in prefrontal cortex. *Nature*.
- 604 Miller, E. K., & Cohen, C. J. (2001). An Integrative Theory of Prefrontal Cortex Function. *Annual review of*  
605 *neuroscience*, 167-202.
- 606 Mongillo, G., Barak, O., & Tsodyks, M. (2008, 3 14). Synaptic Theory of Working Memory. *Science*,  
607 319(5869), 1543.



- 608 Murray, J., Bernacchia, A., Freedman, D., Romo, R., Wallis, J., Cai, X., . . . Wang, X. (2014). A hierarchy of  
609 intrinsic timescales across primate cortex. *Nature Neuroscience*.
- 610 Murray, J., Bernacchia, A., Roy, N., Constantinidis, C., Romo, R., & Wang, X.-J. (2017). Stable population  
611 coding for working memory coexists with heterogeneous neural dynamics in prefrontal cortex.  
612 *Proceedings of the National Academy of Sciences*, 114(2), 394-399.
- 613 Orhan, A., & Ma, W. (2019). A diverse range of factors affect the nature of neural representations  
614 underlying short-term memory. *Nature Neuroscience*, 22(2), 275-283.
- 615 Remington, E., Narain, D., Hosseini, E., & Jazayeri, M. (2018). Flexible sensorimotor computations  
616 through rapid reconfiguration of cortical dynamics. *Neuron*, 98(5), 1005-1019.
- 617 Rigotti, M., Barak, O., Warden, M., Wang, X., Daw, N., Miller, E., & Fusi, S. (2013). The importance of  
618 mixed selectivity in complex cognitive tasks. *Nature*.
- 619 Rikhye, R., Gilra, A., & Halassa, M. (2018). Thalamic regulation of switching between cortical  
620 representations enables cognitive flexibility. *Nature neuroscience*, 21(12), 1753.
- 621 Schmitt, L., Wimmer, R., Nakajima, M., Happ, M., Mofakham, S., & Halassa, M. (2017). Thalamic  
622 amplification of cortical connectivity sustains attentional control. *Nature*, 545(7653), 219.
- 623 Siegel, M., Buschman, T., & Miller, E. (2015, 6 19). Cortical information flow during flexible sensorimotor  
624 decisions. *Science*, 348(6241), 1352.
- 625 Sompolinsky, H., Crisanti, A., & Sommers, H. J. (1988). Chaos in random neural networks. *Physical review  
626 letters*, 259.
- 627 Spaak, E., Watanabe, K., Funahashi, S., & Stokes, M. (2017). Stable and dynamic coding for working  
628 memory in primate prefrontal cortex. *Journal of Neuroscience*, 37(27), 6503-6516.
- 629 Steel, Z. (n.d.). The global prevalence of common mental disorders: a systematic review and meta-  
630 analysis 1980–2013. *International Journal of Epidemiology*, 43.
- 631 Stokes, M., Kusunoki, M., Sigala, N., Nili, H., Gaffan, D., & Duncan, J. (2013). Dynamic coding for cognitive  
632 control in prefrontal cortex. *Neuron*.
- 633 Sussillo, D. (2014). Neural circuits as computational dynamical systems. *Current opinion in neurobiology*,  
634 25, 156-163.
- 635 Sussillo, D. (2014). Neural circuits as computational dynamical systems. *Current opinion in neurobiology*,  
636 156-163.
- 637 Tsodyks, M., Pawelzik, K., & Markram, H. (1998). Neural networks with dynamic synapses. *Neural  
638 computation*, 10(4), 821-835.
- 639 Wang, W., & Slotine, J. (2005). On partial contraction analysis for coupled nonlinear oscillators.  
640 *Biological Cybernetics*.
- 641 Wasmuht, D., Spaak, E., Buschman, T., Miller, E., & Stokes, M. (2018). Intrinsic neuronal dynamics  
642 predict distinct functional roles during working memory. *Nature Communications*.

643 Wei, Z., Inagaki, H., Li, N., Svoboda, K., & Druckmann, S. (2019). An orderly single-trial organization of  
644 population dynamics in premotor cortex predicts behavioral variability. *Nature communications*,  
645 *10*(1), 216.

646
